# Supplementary material
Source: MDPI journal article supplement (https://www.mdpi.com/2077-1444/15/3/260)
Supplement: s1 [file s1]

## Supplementary Material

**Tables S1.** All used scales, including their items

| Scale/items                                                                                                                                                                                                                                                                                          | Turkish Muslim subsample                                                                                                                                                                                                                                                  | German Christian subsample                                                                                                                                                                                                                |
|------------------------------------------------------------------------------------------------------------------------------------------------------------------------------------------------------------------------------------------------------------------------------------------------------|---------------------------------------------------------------------------------------------------------------------------------------------------------------------------------------------------------------------------------------------------------------------------|-------------------------------------------------------------------------------------------------------------------------------------------------------------------------------------------------------------------------------------------|
| <b>Sociodemographic variables</b>                                                                                                                                                                                                                                                                    |                                                                                                                                                                                                                                                                           |                                                                                                                                                                                                                                           |
| Age ( <i>How old are you? Open answer format, in years</i> )                                                                                                                                                                                                                                         | Kaç yaşındasınız? _____ (sayı olarak)                                                                                                                                                                                                                                     | Wie alt sind Sie? _____ (in Zahlen)                                                                                                                                                                                                       |
| Gender ( <i>Please indicate your gender: male, female, diverse</i> )                                                                                                                                                                                                                                 | Lütfen cinsiyetinizi belirtiniz:<br>a. Erkek<br>b. Kadın<br>c. Diğer                                                                                                                                                                                                      | Bitte geben Sie Ihr Geschlecht an:<br>a. männlich<br>b. weiblich<br>c. divers                                                                                                                                                             |
| Denominational affiliation ( <i>Are you...</i> )                                                                                                                                                                                                                                                     | Aşağıdakilerden hangisi sizi tanımlar? ( <i>Which of the following describes you?</i> )<br>a. Sünniyim ( <i>I am Sunni</i> )<br>b. Şiiyim ( <i>I am Shia</i> )<br>c. Aleviyim ( <i>I am Alevi</i> )<br>d. Diğer ( <i>other</i> )<br>e. Bilmiyorum ( <i>I don't know</i> ) | Sind Sie ... ( <i>Are you...</i> )<br>a. Protestant*in ( <i>Protestant</i> )<br>b. Katholik*in ( <i>Catholic</i> )<br>c. Sonstige christliche Konfessionen, und zwar: _____ ( <i>Another Christian denomination, open answer format</i> ) |
| <b>Religiosity: Faith-Oriented Reflection Scale (Watson et al., 2011)</b>                                                                                                                                                                                                                            |                                                                                                                                                                                                                                                                           |                                                                                                                                                                                                                                           |
| 1. ( <i>Faith in Christ is what nourishes the intellect and makes the intellectual life prosperous and productive.</i> )<br>2. ( <i>My practice in Christianity is an inner reflection of my faith.</i> )<br>3. ( <i>Understanding science and the Bible helps one to realize that God exists.</i> ) | 1. Der Glaube an Christus ist es, der den Intellekt nährt und das intellektuelle Leben blühend und produktiv macht.<br>2. Meine Praxis im Christentum ist eine innere Widerspiegelung meines Glaubens.                                                                    | 1. Allah inancı akli besler ve entelektüel yaşamı zenginleştirir ve üretken hale getirir<br>2. İslami yaşantım, imanımın içsel bir tefekkürüdür.<br>3. Bilimi ve Kur'anı anlamak, Allah'ın varlığını kavramaya yardım eder.               |

|                                                                                                                               |                                                                                                                                                 |                                                                                                                                                         |
|-------------------------------------------------------------------------------------------------------------------------------|-------------------------------------------------------------------------------------------------------------------------------------------------|---------------------------------------------------------------------------------------------------------------------------------------------------------|
| 4. <i>I believe that through science and religion one can really understand the meaning of life.</i>                          | 3. Das Verständnis von Wissenschaft und Bibel hilft einem zu erkennen, dass Gott existiert.                                                     | 4. Bilim ve din aracılığı ile hayatın anlamının gerçekten anlaşılabilmesine inanıyorum.                                                                 |
| 5. <i>I have always held religious beliefs similar to the ones I hold now—I have never had times of doubt or questioning.</i> | 4. Ich glaube, dass man durch Wissenschaft und Religion den Sinn des Lebens wirklich verstehen kann.                                            | 5. Kendimi bildim bileli şu anda benimsediğim dini inançlara sahibim – dini inançlarımdan asla şüphe ettiğim ya da onları sorguladığım zamanlar olmadı. |
| 6. <i>Based on what I've heard or read, I have come to the conclusion that Christianity is the right religion for me.</i>     | 5. Ich habe immer ähnliche religiöse Überzeugungen gehabt wie jetzt - ich habe sie nie gezweifelt oder in Frage gestellt.                       | 6. Okuduğum ve duyduğum şeylere dayanarak İslâmın benim için doğru din olduğu sonucuna vardım.                                                          |
| 7. <i>I have seriously thought about my religious beliefs and I am very committed to the faith I now have).</i>               | 6. Aufgrund dessen, was ich gehört oder gelesen habe, bin ich zu dem Schluss gekommen, dass das Christentum die richtige Religion für mich ist. | 7. Dini inançlarım hakkında ciddi bir şekilde düşündüm ve şimdi sahip olduğum inanca çok bağlıyım.                                                      |
|                                                                                                                               | 7. Ich habe ernsthaft über meine religiösen Überzeugungen nachgedacht, und ich bin dem Glauben, den ich jetzt habe, sehr verpflichtet.          |                                                                                                                                                         |

---

**Intellectual Openness: Intellect-Oriented Reflection Scale (Watson et al., 2011)**

|                                                                                                                                                |                                                                                                                                                           |                                                                                                              |
|------------------------------------------------------------------------------------------------------------------------------------------------|-----------------------------------------------------------------------------------------------------------------------------------------------------------|--------------------------------------------------------------------------------------------------------------|
| 1. <i>(Questioning life leads to answers, which ultimately leads to the truth.</i>                                                             | 1. Das Leben zu hinterfragen führt zu Antworten, die letztlich zur Wahrheit führen.                                                                       | 1. Hayatı sorgulamak cevaplara, cevaplar da nihayetinde hakikate götürür                                     |
| 2. <i>The Bible does not reveal all the essential truth or facts about life and God and that is why God has blessed us with our intellect.</i> | 2. Die Bibel offenbart nicht alle wesentlichen Wahrheiten oder Fakten über das Leben und Gott, und deshalb hat Gott uns mit unserem Verstand gesegnet.    | 2. Kur'an hayat ve Allah hakkında bütün hakikatleri bildirmez; işte bunun için Allah bize akıl bahşetmiştir  |
| 3. <i>I believe as humans we should use our minds to explore all fields of thought from science to metaphysics.</i>                            | 3. Ich glaube, dass wir als Menschen unseren Verstand nutzen sollten, um alle Bereiche des Denkens zu erforschen, von der Wissenschaft bis zur Metaphysik | 3. İnsanlar olarak biz, bilimden metafiziğe düşüncenin tüm alanlarını keşfetmek için aklımızı kullanmalıyız. |
| 4. <i>In search of knowledge, one should resort to all methods, be they experimental or rational.</i>                                          |                                                                                                                                                           | 4. Bilgi arayışında, kişi deneysel veya rasyonel olsun bütün yöntemlere başvurulmalıdır.                     |

---

|                                                                                            |                                                                                                                                                                                                                      |                                                                                   |
|--------------------------------------------------------------------------------------------|----------------------------------------------------------------------------------------------------------------------------------------------------------------------------------------------------------------------|-----------------------------------------------------------------------------------|
| 5. <i>Studying nature and the universe would reveal treasures of knowledge and truth.)</i> | 4. Auf der Suche nach Wissen sollte man auf alle Methoden zurückgreifen, seien sie experimentell oder rational.<br>5. Das Studium der Natur und des Universums würde Schätze des Wissens und der Wahrheit enthüllen. | 5. Doğa ve evreni araştırmak, bilgi ve gerçeğin hazinelerini ortaya çıkaracaktır. |
|--------------------------------------------------------------------------------------------|----------------------------------------------------------------------------------------------------------------------------------------------------------------------------------------------------------------------|-----------------------------------------------------------------------------------|

### **Xenosophia (Streib et al., 2010)**

|                                                                                                                            |                                                                                                                                                |                                                                                                                 |
|----------------------------------------------------------------------------------------------------------------------------|------------------------------------------------------------------------------------------------------------------------------------------------|-----------------------------------------------------------------------------------------------------------------|
| 1. <i>(We can learn from each other what ultimate truth each religion contains.</i>                                        | 1. Wir können voneinander lernen, welche letzte Wahrheit jede Religion enthält.                                                                | 1. Her dinin hangi nihai gerçeği içerdiğini birbirimizden öğrenebiliriz.                                        |
| 2. <i>We need to look beyond the denominational and religious differences to find the ultimate reality.</i>                | 2. Wir müssen über die konfessionellen und religiösen Unterschiede hinausschauen, um die letzte Wirklichkeit zu finden.                        | 2. Nihai gerçekliği bulmak için, mezhep ve din farklılıklarını aşmak zorundayız.                                |
| 3. <i>When I make a decision, I am open to contradicting proposals from diverse sources and philosophical standpoints.</i> | 3. Wenn ich eine Entscheidung treffe, bin ich offen für widersprechende Vorschläge aus verschiedenen Quellen und philosophischen Standpunkten. | 3. Bir karar verirken, değişik kaynakların ve felsefi yaklaşımların birbiriyle uyuşmayan önerilerine açığımdır. |
| 4. <i>Religious stories and representations from any religion unite me with the ultimate universe.</i>                     | 4. Religiöse Geschichten und Vorstellungen aus jeder Religion vereinen mich mit dem Universum.                                                 | 4. Herhangi bir dinin dini hikaye ve tasvirleri beni evrenle bütünleştirir.                                     |
| 5. <i>The truth I see in other world views leads me to re-examine my current views.)</i>                                   | 5. Die Wahrheit, die ich in anderen Weltanschauungen sehe, führt mich dahin, meine eigenen Ansichten zu überprüfen.                            | 5. Başka dünya görüşlerinde gördüğüm doğruluk, mevcut görüşlerimi gözden geçirmeme yol açmaktadır.              |

### **Prejudice**

#### **Prejudice against Each Other**

#### **Anti-Muslim Prejudice (Evangelical Church in Germany, 2022)**

1. Muslimen sollte die Zuwanderung nach Deutschland untersagt werden. (*Muslims should not be allowed to immigrate to Germany.*)
2. Muslimen stehen in Deutschland die gleichen Rechte zu wie allen anderen.

#### **Anti-Western Prejudice (Albaghli & Carlucci, 2021)**

1. Batı'daki temel sorun, şiddet uygulayan hükümetleridir. (*The main issue in the West is with their violent governments.*)
2. İslam dünyasındaki tüm acılardan Batılı hükümetler sorumludur. (*Western*

---

(Muslims have the same rights in Germany as everyone else.; reverse coded)

3. Durch die vielen Muslime hier fühle ich mich manchmal wie ein Fremder im eigenen Land. (*Because of the many Muslims here, I sometimes feel like a stranger in my own country.*)
4. Muslime neigen zu Kriminalität. (*Muslims tend to commit crime.*)

governments are responsible for all the suffering in the Islamic world.)

3. Batılı hükümetler İslam dünyasına özgürlük ve insan hakları getirmek için ellerinden geleni yapıyorlar. (*The Western governments are doing what they can to bring freedom and human rights the Islamic world.*; reverse coded)
4. Batılı hükümetler, Orta Doğu'daki insanlara yardım etme ve onları desteklemeyle iyi ediyorlar. (*Western governments are doing well in helping and supporting people in the Middle East region.*; reverse coded)
5. Bütün Batılı hükümetler aynıdır. Müslümanları umursamıyorlar. (*All Western governments are the same. They simply do not care about Muslims.*)
6. Batılılar Müslüman göçmenlere yardım ediyorlar ve onlara karşı şefkatli ve sevgi dolular. (*Western people are caring and loving and have helped Muslim immigrants.*; reverse coded)
7. Batılılara Müslümanlardan daha çok güveniyorum. (*I trust Westerners more than I trust Muslims.*; reverse coded)
8. Batılılar Müslümanlara karşı önyargılılardır. (*Westerners are prejudiced towards Muslims.*)
9. Batı kültürü yozlaşmıştır. Bundan dolayı onlarsız daha iyiyiz. (*The Western culture*
-

---

*is corrupted. This is why we are better off without them.)*

10. Batı kültürü harikadır ve onlardan öğrenilecek birçok şey vardır. (*The Western culture is wonderful, and there is a lot that we can learn from them.*; reverse coded)
11. Batı kültürü insanlara diğer dinleri ve ideolojileri kabul etmeleri ve saygı duymalarını öğretir. (*The Western culture teaches people that they should be accepting and respect other religions and ideologies.*; reverse coded)

### Anti-Semitism

Primary Anti-Semitism (Evangelical Church in Germany, 2022)

1. (*Even today, the influence of the Jews is still too great.*)
2. (*More than others, Jews use evil tricks to achieve what they want.*)
3. (*The Jews simply have something special and peculiar about them and don't really fit in with us.*)

1. Auch heute noch ist der Einfluss der Juden zu groß.
2. Juden arbeiten mehr als andere mit üblen Tricks, um das zu erreichen, was sie wollen.
3. Die Juden haben einfach etwas Besonderes und Eigentümliches an sich und passen nicht so recht zu uns.

1. Günümüzde bile Yahudilerin etkisi fazla büyüktür.
2. Yahudiler istediklerini elde etmek için başkalarına göre daha fazla çirkin hilelere başvururlar.
3. Yahudiler kendilerine has ve tuhaftır ve bize pek uymazlar.

Secondary Anti-Semitism

(Evangelical Church in Germany, 2022)

1. Reparationsforderungen an Deutschland nützen oft gar nicht mehr den Opfern, sondern einer Holocaust-Industrie von findigen Anwälten. (*Claims for reparations against Germany often no longer benefit the*

(Heitmeyer, 2005)

1. Yahudiler bugün Holokost'un anısını kendi çıkarları için kullanmaktadır. (*Jews today use the memory of the Holocaust for their own benefit.*)
  2. Birçok Yahudi Nazi Döneminin geçmişinden faydalanmaya çalışmaktadır.
-

---

*victims, but a Holocaust industry of resourceful lawyers.)*

*(Many Jews try to capitalise on the past of the Nazi era.)*

2. Wir sollten uns lieber gegenwärtigen Problemen widmen als Ereignissen, die mehr als 70 Jahre vergangen sind. (*We should rather devote ourselves to current problems than to events that happened more than 70 years ago.*)

#### Israel-related Anti-Semitism (Evangelical Church in Germany, 2022)

1. *(The Israeli policy makes me dislike the Jews more and more.*
2. *Israel's policy in Palestine is just as bad as the Nazi policy in the Second World War.*
3. *Other nations may also have their dark sides, but Israel's crimes are the most serious.)*

1. Durch die israelische Politik werden mir die Juden immer unsympathischer.
2. Israels Politik in Palästina ist genauso schlimm wie die Politik der Nazis im zweiten Weltkrieg.
3. Auch andere Nationen mögen ihre Schattenseiten haben, aber die Verbrechen Israels wiegen am schwersten.

1. İsrail'in siyasetinden dolayı, Yahudileri gittikçe daha antipatik buluyorum.
2. İsrail'in Filistin'deki siyaseti ikinci dünya savaşındaki Nazi siyaseti kadar kötüdür.
3. Diğer ulusların da karanlık yönleri vardır ancak İsrail'in suçları en ağırıdır.

#### Anti-Refugee Prejudice (Evangelical Church in Germany, 2022)

1. *(Refugees living here threaten my personal way of life.*
2. *Refugees should always be welcome in Germany/Turkey.) (reverse coded)*

1. Flüchtlinge, die hier leben, bedrohen meine persönliche Lebensweise.
2. Flüchtlinge sollten in Deutschland immer willkommen sein.

1. Burada yaşayan mülteciler benim kişisel yaşam tarzımı tehdit ediyor.
2. Mülteciler Türkiye'de her zaman hoş kabul edilmelidir

---

#### Defense against Secularism Scale (Watson, Chen, Morris, & Stephenson, 2015)

---

|                                                                                                                                                                                    |                                                                                                                                                                                                                              |                                                                                                                                                            |
|------------------------------------------------------------------------------------------------------------------------------------------------------------------------------------|------------------------------------------------------------------------------------------------------------------------------------------------------------------------------------------------------------------------------|------------------------------------------------------------------------------------------------------------------------------------------------------------|
| 1. <i>(Reason is a weapon that the culture uses to destroy faith.</i>                                                                                                              | 1. Die Vernunft ist eine Waffe, die die Kultur einsetzt, um den Glauben zu zerstören.                                                                                                                                        | 1. Akıl, inancı yok etmek için kültürün kullandığı bir silahtır.                                                                                           |
| 2. <i>Secular commitments to reason and open-mindedness are a ploy to purge our laws of the essential foundations that they must have in God.</i>                                  | 2. Säkulare Bekenntnisse zu Vernunft und Offenheit sind ein Trick, um unseren Gesetzen die wesentlichen Grundlagen, die sie in Gott haben müssen, zu entziehen.                                                              | 2. Akıl ve açık görüşlülüğe seküler bağlılıklar asıl temelleri Allah'a dayanması gereken yasalarımızı tasfiye etmek için birer taktiktir.                  |
| 3. <i>Pressure to be reasonable is a wedge that the culture tries to drive between us and our faith.</i>                                                                           | 3. Der Druck, vernünftig zu sein, ist ein Keil, den die Kultur zwischen uns und unseren Glauben zu treiben versucht.                                                                                                         | 3. Akılcı olmak için baskı; kültürün bizim ve inancımızın arasına çekmeye çalıştığı bir settir.                                                            |
| 4. <i>Science, philosophy, and co-called "rationality" rest upon a sinful human pride that seeks to weaken Christian faith.</i>                                                    | 4. Wissenschaft, Philosophie und so genannte "Rationalität" beruhen auf einem sündhaften menschlichen Stolz, der den christlichen Glauben zu schwächen sucht.                                                                | 4. Bilim, felsefe ve sözde "akılcılık" İslam inancını zayıflatmaya çalışan günahkar bir insani gurura dayanır.                                             |
| 5. <i>Cultural demands that we be reasonable are just a way to destroy biblical definitions of marriage.</i>                                                                       | 5. Kulturelle Forderungen, dass wir vernünftig sein sollen, sind nur ein Weg, die biblische Definition der Ehe zu zerstören.                                                                                                 | 5. Akılcı olmamızı isteyen kültürel talepler yalnızca İslam'ın evlilik anlayışını yok etmenin bir yoludur.                                                 |
| 6. <i>Reason cannot be trusted, only faith can.</i>                                                                                                                                | 6. Nur dem Glauben kann man trauen, aber nicht der Vernunft.                                                                                                                                                                 | 6. Akla güven olmaz, sadece inanca olabilir.                                                                                                               |
| 7. <i>In their confused commitment to reason, intellectuals are unable to avoid the deeply mistaken notion that creation of humanity is based upon so-called scientific facts.</i> | 7. In ihrem verwirrten Bekenntnis zur Vernunft sind die Intellektuellen nicht in der Lage, die zutiefst irrige Vorstellung zu vermeiden, dass die Schöpfung der Menschheit auf sogenannten wissenschaftlichen Fakten beruht. | 7. Akla olan şaşkın bağlılıkları içinde entelektüeller insanlığın yaratılışının sözde bilimsel gerçeklere dayandığına dair derin yanılgıdan kurtulamazlar. |
| 8. <i>Secularists believe the use of reason and open-mindedness in political life because the real motive is to destroy our religious beliefs.</i>                                 | 8. Säkularistische Überzeugungen drängen darauf, im politischen Leben Vernunft und Aufgeschlossenheit walten zu lassen, weil das wahre Motiv darin besteht, unseren religiösen Glauben zu zerstören.                         | 8. Seküler inançlar siyasal yaşamda akıl ve açık fikirliliğin kullanılmasını teşvik eder çünkü asıl amaç dini inancımızı yok etmektir.                     |
| 9. <i>The secular demand that we be reasonable is a strategy to get us to reject our faith when it conflicts with science.</i>                                                     | 9. Die säkulare Forderung, dass wir vernünftig sein sollen, ist eine Strategie, um uns dazu zu bringen, unseren Glauben zu verwerfen,                                                                                        | 9. Akılcı olmamıza dair seküler talep bilimle çatıştığında inancımızı reddetmemizi isteyen bir stratejidir.                                                |
| 10. <i>The government should determine what a marriage is based upon the Bible and not upon reasoning about sexuality and nature.</i>                                              |                                                                                                                                                                                                                              | 10. Hükümet, cinsellik ve doğa üzerine akıl yürüterek değil, islam dinine göre evliliğin ne olduğunu belirlemelidir.                                       |
| 11. <i>The true Christian can put no trust at all in reason, science, and philosophy.</i>                                                                                          |                                                                                                                                                                                                                              | 11. Gerçek Müslüman, akıl, bilim ve felsefeye hiçbir şekilde güvenemez.                                                                                    |

|                                                                                                                                                                                                                                                                                                                                                                                                                                                                                                                                                                                                                                                                                                                                              |                                                                                                                                                                                                                                                                                                                                                                                                                                                                                                                                                                                                                                                                                                                                                                                                                                                                                                                                                                                                                                                                                           |                                                                                                                                                                                                                                                                                                                                                                                                                                                                                                                                                                                                                                                                                                                  |
|----------------------------------------------------------------------------------------------------------------------------------------------------------------------------------------------------------------------------------------------------------------------------------------------------------------------------------------------------------------------------------------------------------------------------------------------------------------------------------------------------------------------------------------------------------------------------------------------------------------------------------------------------------------------------------------------------------------------------------------------|-------------------------------------------------------------------------------------------------------------------------------------------------------------------------------------------------------------------------------------------------------------------------------------------------------------------------------------------------------------------------------------------------------------------------------------------------------------------------------------------------------------------------------------------------------------------------------------------------------------------------------------------------------------------------------------------------------------------------------------------------------------------------------------------------------------------------------------------------------------------------------------------------------------------------------------------------------------------------------------------------------------------------------------------------------------------------------------------|------------------------------------------------------------------------------------------------------------------------------------------------------------------------------------------------------------------------------------------------------------------------------------------------------------------------------------------------------------------------------------------------------------------------------------------------------------------------------------------------------------------------------------------------------------------------------------------------------------------------------------------------------------------------------------------------------------------|
| <p>12. <i>Secular evaluations of whether a pregnancy makes sense are just one example of how beliefs based upon reason destroy the life affirming beliefs of our faith.</i></p> <p>13. <i>Our culture uses reason to attack prayer in public settings and to disparage our Christian faith more generally.</i></p> <p>14. <i>Reason is an enemy of faith and must be rejected.</i></p> <p>15. <i>Intellectuals use reason to undermine our Christian sense of right and wrong.</i></p> <p>16. <i>The demands of culture and reason to base beliefs on science must be rejected as incompatible with religion.</i></p> <p>17. <i>The theory of evolution is an example of how science and reason are dedicated to eliminating faith.)</i></p> | <p>wenn er im Widerspruch zur Wissenschaft steht.</p> <p>10. Die Regierung sollte festlegen, was eine Ehe ist, und zwar auf der Grundlage der Bibel und nicht auf der Grundlage von Überlegungen über Sexualität und Natur.</p> <p>11. Der wahre Christ kann Vernunft, Wissenschaft und Philosophie überhaupt nicht vertrauen.</p> <p>12. Säkulare Beurteilungen, ob eine Schwangerschaft sinnvoll ist, sind nur ein Beispiel dafür, wie auf Vernunft basierende Überzeugungen die lebensbejahenden Überzeugungen unseres Glaubens zerstören.</p> <p>13. Unsere Kultur benutzt die Vernunft, um das Gebet in öffentlichen Räumen anzugreifen und unseren christlichen Glauben im Allgemeinen zu verunglimpfen.</p> <p>14. Die Vernunft ist der Feind des Glaubens und muss verworfen werden.</p> <p>15. Intellektuelle benutzen die Vernunft, um unser christliches Verständnis von Recht und Unrecht zu untergraben.</p> <p>16. Die Forderung der Kultur und der Vernunft, den Glauben auf die Wissenschaft zu stützen, muss als unvereinbar mit der Religion zurückgewiesen werden.</p> | <p>12. Bir hamileliğin anlamı olup olmadığına ilişkin seküler değerlendirmeler akla dayalı inanışların inancımızın yaşamı önemseyen inanışlarını nasıl yıktığının bir örneğidir.</p> <p>13. Kültürümüz, kamusal alanda ibadeti engellemek ve daha genel olarak dini inancımızı kötülemek için akli kullanır.</p> <p>14. Akıl inancın düşmanıdır ve reddedilmelidir.</p> <p>15. Entelektüeller, İslami kaynaklı doğru ve yanlış algımızı zayıflatmak için akli kullanırlar.</p> <p>16. Aklın ve kültürün, inançları bilimsel temellere dayandırma talepleri reddedilmelidir çünkü din ile bağdaşmaz.</p> <p>17. Evrim teorisi, bilim ve aklın kendini inancı bertaraf etmeye nasıl adanmışının bir örneğidir.</p> |
|----------------------------------------------------------------------------------------------------------------------------------------------------------------------------------------------------------------------------------------------------------------------------------------------------------------------------------------------------------------------------------------------------------------------------------------------------------------------------------------------------------------------------------------------------------------------------------------------------------------------------------------------------------------------------------------------------------------------------------------------|-------------------------------------------------------------------------------------------------------------------------------------------------------------------------------------------------------------------------------------------------------------------------------------------------------------------------------------------------------------------------------------------------------------------------------------------------------------------------------------------------------------------------------------------------------------------------------------------------------------------------------------------------------------------------------------------------------------------------------------------------------------------------------------------------------------------------------------------------------------------------------------------------------------------------------------------------------------------------------------------------------------------------------------------------------------------------------------------|------------------------------------------------------------------------------------------------------------------------------------------------------------------------------------------------------------------------------------------------------------------------------------------------------------------------------------------------------------------------------------------------------------------------------------------------------------------------------------------------------------------------------------------------------------------------------------------------------------------------------------------------------------------------------------------------------------------|



---

17. Die Evolutionstheorie ist ein Beispiel dafür, wie Wissenschaft und Vernunft dazu dienen, den Glauben zu beseitigen.

---

**Religious Fundamentalism (Pollack et al., forthcoming)**

Christian/inter-religious version

1. Nur meine Religion ist in der Lage, die Probleme unserer Zeit zu lösen. (*Only my religion is able to solve the problems of our time.*)
2. Die Befolgung der Gebote meiner Religion ist für mich wichtiger als die Gesetze des Staates, in dem ich lebe. (*Obeying the commandments of my religion is more important to me than the laws of the state in which I live.*)
3. Es gibt nur eine wahre Religion. (*There is only one true religion.*)
4. Angehörige meiner Religion sollten zu ihren religiösen Wurzeln zurückkehren (*Members of my religion should return to their religious roots.*)

Muslim version

1. Yalnızca İslam çağımızın sorunlarını çözebilir. (*Only Islam can solve the problems of our time.*)
2. Benim için dinimin emirlerine uymak yaşadığım ülkenin kanunlarına uymaktan daha önemlidir. (*Obeying the commandments of my religion is more important to me than the laws of the state in which I live.*)
3. Yalnızca gerçek bir din vardır. (*There is only one true religion.*)
4. Müslümanlar Hz. Muhammed'in zamanında olduğu gibi bir toplumsal düzene dönmeye çalışmalıdır. (*Muslims should strive for a return to a social order like the one that prevailed at the time of the Prophet Mohammed.*)

---

*Note.* English translations in brackets were not provided to the participants but solely added for the reader's benefit.
